# Supplementary material
Source: MDPI journal article supplement (https://www.mdpi.com/2073-4395/7/1/16)
Supplement: s1 [file s1]

**Supplemental Materials and Methods**

**Micrographs of arabidopsis (*Arabidopsis thaliana*) chloroplasts**

Arabidopsis (Col-0) plants were grown in growth chambers (Percivial, USA) at 21°C in a 12:12 day/night photoperiod at 125 µmol m2 s-1. Mature leaves were harvested at ED, and cut into 2 mm sections. Leaf sections were fixed and imbedded essentially as described by Pfister et al., 2014. Briefly, leaf sections were incubated in 2% (v/v) glutaraldehyde / 0.05 M sodium cacodylate buffer pH 7.4 at 4°C overnight. Sections were washed three times in with 0.1M cacodylate buffer, and dehydrated in a series of aqueous ethanol solutions from 50 to 100% (v/v) ethanol. Sections were embedded in Spurr epoxy resin (Agar Scientific), and 0.5µm thin sections were cut with a diamond knife. Sections were stained with toluidine blue for 20 min at room temperature and imaged by light microscopy.

**Growth conditions and plant material**

For all experiments, the genetically broad accession, TP1245, from Agroscope (Reckenholz, Switzerland) was used. Plant material was clonally propagated by splitting 60 to 90 day old plants. To maintain growth uniformity, clones were dissected into cuttings that only contained one apical meristem and one root meristem. Clones were grown for 30 days prior to harvesting. The plant growth medium was a mix of soil, peat and perlite at a ratio of 3:2:1.

Partially sunny and cloudy simulated growth conditions were carried out in a glasshouse. Direct intense sunlight was shaded to produce uniformity across the experimental growth area. The intensity of the uniform indirect sunlight was between 50 to 150 µmol m-2 s-1, depending on time of day and position of the sun. For the partially sunny growth conditions, the indirect sunlight was supplemented with 200 µmol m-2 s-1 additional light intensity from Clean Arc© metal halide lamps (EYE Lighting International, USA). Therefore, the partially sunny simulated conditions had a total intensity of 250 to 350 µmol m-2 s-1, and cloudy simulated conditions had an intensity of 50 to 150 µmol m-2 s-1. Both conditions were carried out under a 14:10 light/dark photoperiod, with a 14-16°C night, 19-23°C day temperature regime. Plants were organized in a random design within the growth area.

To determine the correlation between growth and starch content, plants were grown in climate controlled growth chambers. Growing conditions were carried out under a 14:10 light/dark photoperiod, with a 13-14°C night, 18-19°C day temperature regime. Light was provided by fluorescent T7 bulbs (Phillips, DE), and Grolux© fluorescent lamps (Sylvania, DE) at a ratio of 3:1, and the total light intensity was 200 µmol m-2 s-1.

**Analysis of starch content**

The 32 genotypes that were later selected and clonally propagated were screened using a visual estimation of starch content. At ED and EN, a 5mm circular leaf disk was pressed onto a piece of Whatman 0.8mm filter paper. Eight leaves per time point and plant were pressed. The pressed samples were dried for 30 min at 37°C. The filter paper was then placed in 95% (v/v) ethanol to clear the chlorophyll and then dried again for 30 min at 37°C. The remaining pigments were removed with an aqueous solution containing 5% (v/v) bleach and 20% (v/v) ethanol. After drying for 30 min at 37°C, the pressed samples were stained with Lugol’s solution (Sigma-Aldrich, USA). Pressings from higher starch containing leaves stained darker.

Starch was quantified using a method adapted from Hostettler et al., 2011. Briefly, soluble sugars from 10mg of lyopholized powder from homogenised leaves are extracted with two 80% (v/v) ethanol washes and two 50% (v/v) ethanol washes. In the remaining pellet is boiled in 0.2N KOH to solubilise the starch. The sample is neutralized with 1M acetic acid, and the soluble starch is converted to glucose by α-amylase and amyloglucosidase (Sigma-Aldrich, USA). Glucose was quantified in triplicate using an enzyme linked assay based on hexokinase and glucose-6-phosphate dehydrogenase, which converts NADP to NADPH proportional to the glucose concentration (Sigma-Aldrich, USA). NADPH was quantified by A340 using a Perkin Elmer Enspire© plate reader.

To visualize starch in plant leaves, plants were detached from the roots and placed in 70% (v/v) boiling ethanol. When the plants are clear, generally 30-60 minutes, the plants are removed and placed in Lugol’s solution. After 5 to 10 minutes the Lugol’s solution was removed and the plant was destained with water. Plants were then imaged on a light table to provide back lighting.

**In vitro digestibility of red clover**

Rumen fluid was collected in the morning from a fistulated cow prior to feeding. The rumen fluid was buffered and main and trace elements were added as described by Menke et al., 1988. The 200mg of milled samples were added to a 100mL glass syringe. Samples were incubated and monitored for 24h at 39°C. Gas production was normalized to hay and concentrate standards as described by Menke et al., 1988. Methane gas analysis and calculations were carried out as described by Soliva et al., 2007. Briefly, after the 24h incubation, 150µL gas was removed from the headspace of the glass syringe, and injected into a 5890 Series II Gas Chromatographer (Hewlett Packard, USA), separated on a Carboxen-1000 column (Fluka Chemie, CH), and detected by TCD and FID detectors at 250°C. All samples were calibrated against a 1% H2, 1% O2, 8% CH4, 40% CO2, and 50% N2 (v/v) standard (PanGas, CH).
